# Supplementary material
Source: MDPI journal article supplement (https://www.mdpi.com/2073-4344/9/6/542)
Supplement: s1 [file s1]

# Supplementary Materials: Catalyst/Feedstock Ratio Effect on FCC Using Different Catalysts Samples

A. Alkhlel and Hugo de Lasa (\*)

## Appendix A- BET analysis for CAT-C

Figure S1 reports the N<sub>2</sub> adsorption on CAT-C (free of coke), as well as CAT-C after the run is completed. This analysis includes runs at different C/Os.

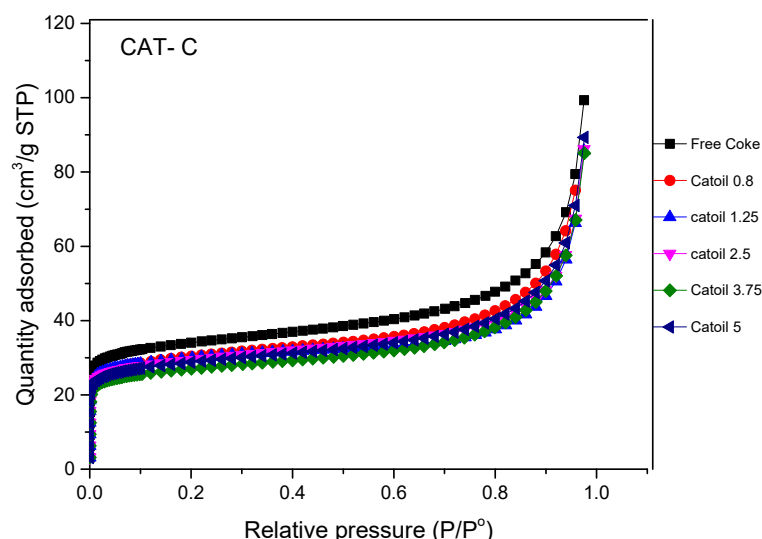

**Figure S1.** BET-Nitrogen Adsorption Plot. N<sub>2</sub> adsorption-desorption isotherms obtained from different samples of CAT-C, after runs at 550 °C and a 7 s contact time.

Figure S2 and Table S1 report the micropore volume for the regenerated CAT-C (free of coke) and the micropore volume for CAT-C after a 7 s and 550 °C run at various C/Os. One can notice the influence of the C/O ratio on the micropores volume while using CAT-C.

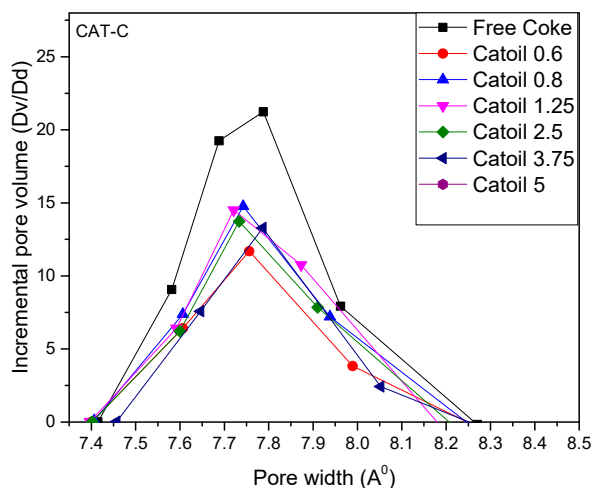

**Figure S2.** Differential Pore Volume (dV/dD) as a Function of the Pore Diameter (D) using the N<sub>2</sub>-Adsorption Isotherms. (■) CAT-C free of coke; (●) CAT-C at C/O = 0.6 g/g; (▲) CAT-C at C/O = 0.8 g/g; (▼) CAT-C at C/O = 1.25 g/g; (◆) CAT-C at C/O = 2.5 g/g (◄); CAT-C at C/O = 3.75 g/g; (◐) CAT-C at C/O = 5 g/g; All samples were analyzed following catalytic cracking runs at 550 °C and 7 s.

**Table S1.** Specific Surface Areas [SSA] ( $\text{m}^2/\text{g}$ ) and Pore Volumes [PV] ( $\text{cm}^3/\text{g}$ ). Mesopore Volumes ( $\text{cm}^3/\text{g}$ ) for CAT-B are determined following catalytic cracking runs at  $550^\circ\text{C}$  and 7 s, using different C/O ratios. SD on repeats:  $\pm 3 \text{ m}^2/\text{g}$ .

| CAT-C Catalyst Sample                        |           |          |         |          |          |        |
|----------------------------------------------|-----------|----------|---------|----------|----------|--------|
|                                              | Free Coke | C/O= 0.6 | C/O=0.8 | C/O=1.25 | C/O=3.75 | C/O=5  |
| BET (SSA)<br>$\text{m}^2/\text{g}$           | 118.5     | 97.8     | 91.9    | 90.2     | 86       | 92.9   |
| PoreVolume (PV)<br>$\text{cm}^3/\text{g}$    | 0.196     | 0.136    | 0.137   | 0.135    | 0.128    | 0.131  |
| Mesopores<br>Volume, $\text{cm}^3/\text{g}$  | 0.142     | 0.0898   | 0.0935  | 0.0930   | 0.0868   | 0.0870 |
| Micropores<br>Volume, $\text{cm}^3/\text{g}$ | 0.0540    | 0.0463   | 0.0439  | 0.0426   | 0.0412   | 0.0440 |

## Appendix B. Product Selectivity

Figure S3 reports for Cat-C at  $550^\circ\text{C}$ , and 7s the Catoil (C/O) ratio effect on various catalytic cracking products as a function of the 1, 3, 5-TIPB conversion. One can observe a similar trend to the one found for CAT-B, and CAT-A (refer to reference 39).

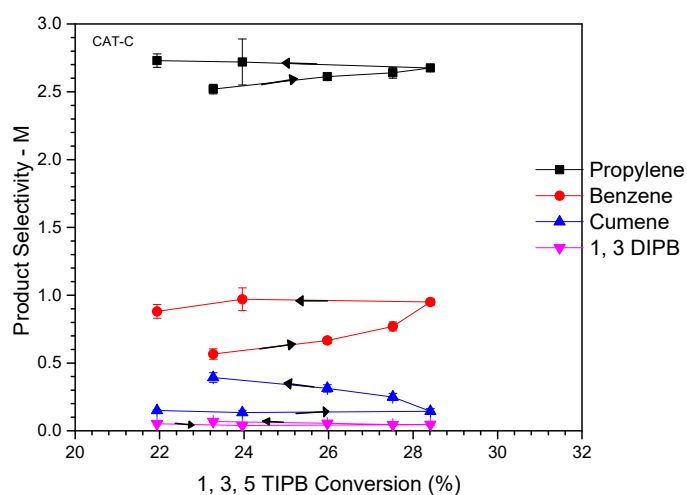

**Figure S3.** Effect of C/O on the Product Selectivity-M Using TIPB on the Catalyst CAT-C. Run Conditions:  $550^\circ\text{C}$  and 7 s, respectively. Notes: a) Direction of the arrows represent an increasing C/O ratio, b) Reported data and standard deviations (vertical bars) represent average values for 4–7 repeat runs.
